# Supplementary material for: Microplasma-assisted synthesis of a mixed-valence Ce-MOF with enhanced oxidase-like activity for colorimetric sensing of dopamine
Source: Royal Society of Chemistry journal article supplement (doi:10.1039/d2an01420c), 2022-01-01
Supplement: d2an01420c1.pdf [file d2an01420c1.pdf]

## Supporting Information

### Microplasma-assisted synthesis of mixed-valence Ce-MOF with enhanced oxidase-like activity for colorimetric sensing of dopamine

Yi Xia, Jiaxin Zhou, Yanying Liu, Yutong Liu, Ke Huang, Huimin Yu, Xue Jiang\*,  
Xiaoli Xiong\*

College of Chemistry and Materials Science, Sichuan Normal University, Chengdu  
610068, China

\*E-mail: jiangxueedu@163.com (X. Jiang), xiongxiaoli2000@163.com (X. Xiong)

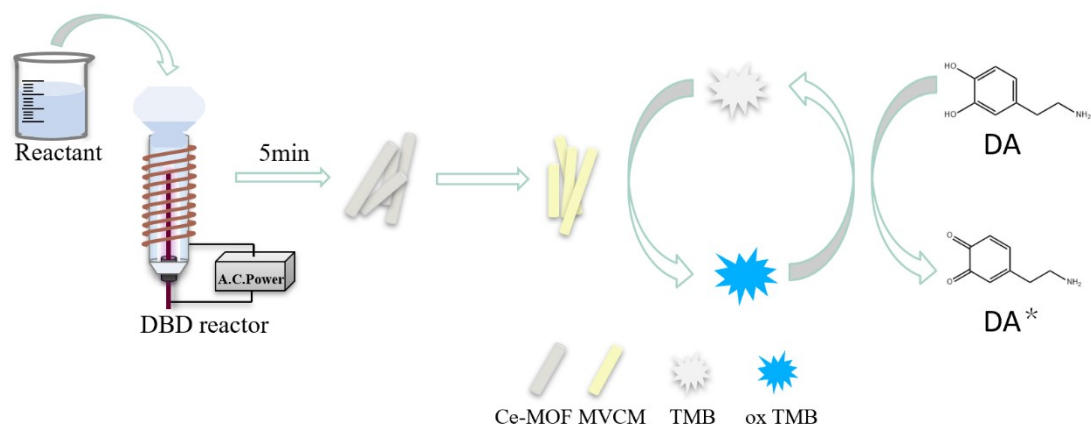

Fig. S1 Schematic illustration of the synthesis of Ce-MOF-DBD and detection of DA based on MVCM-DBD.

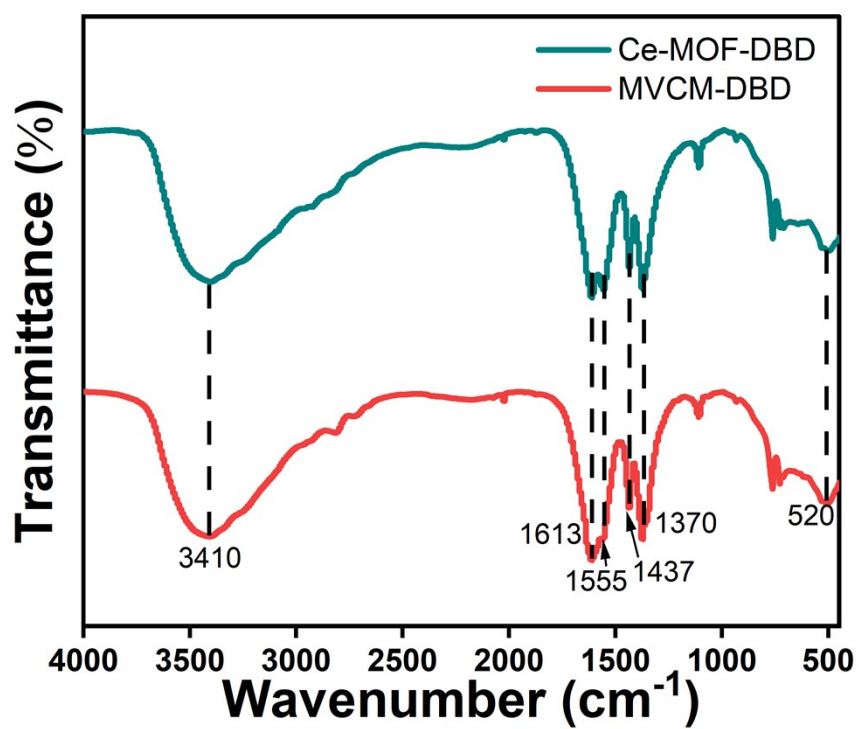

Fig. S2 FT-IR spectrum of MVCM-DBD and Ce-MOF-DBD.

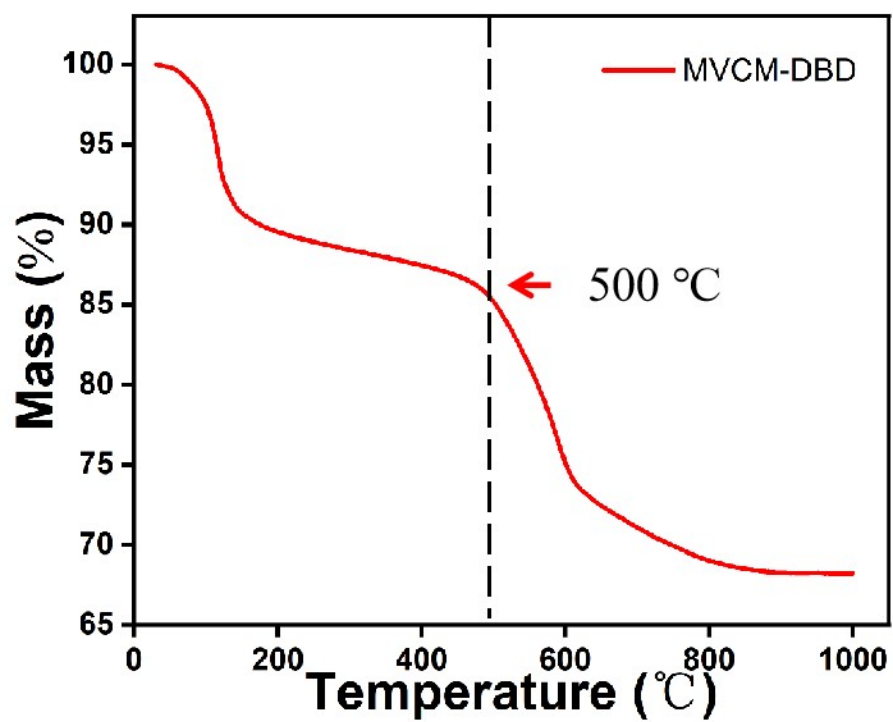

Fig. S3 TGA curves of MVCM-DBD.

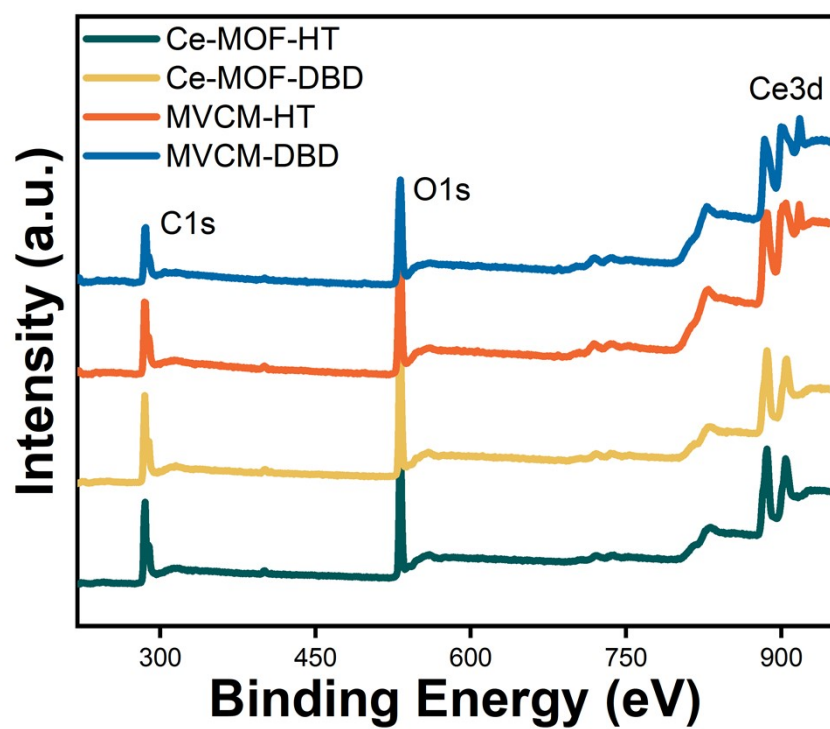

Fig. S4 XPS spectra of Ce-MOF and MVCM synthesized by microplasma and hydrothermal method.

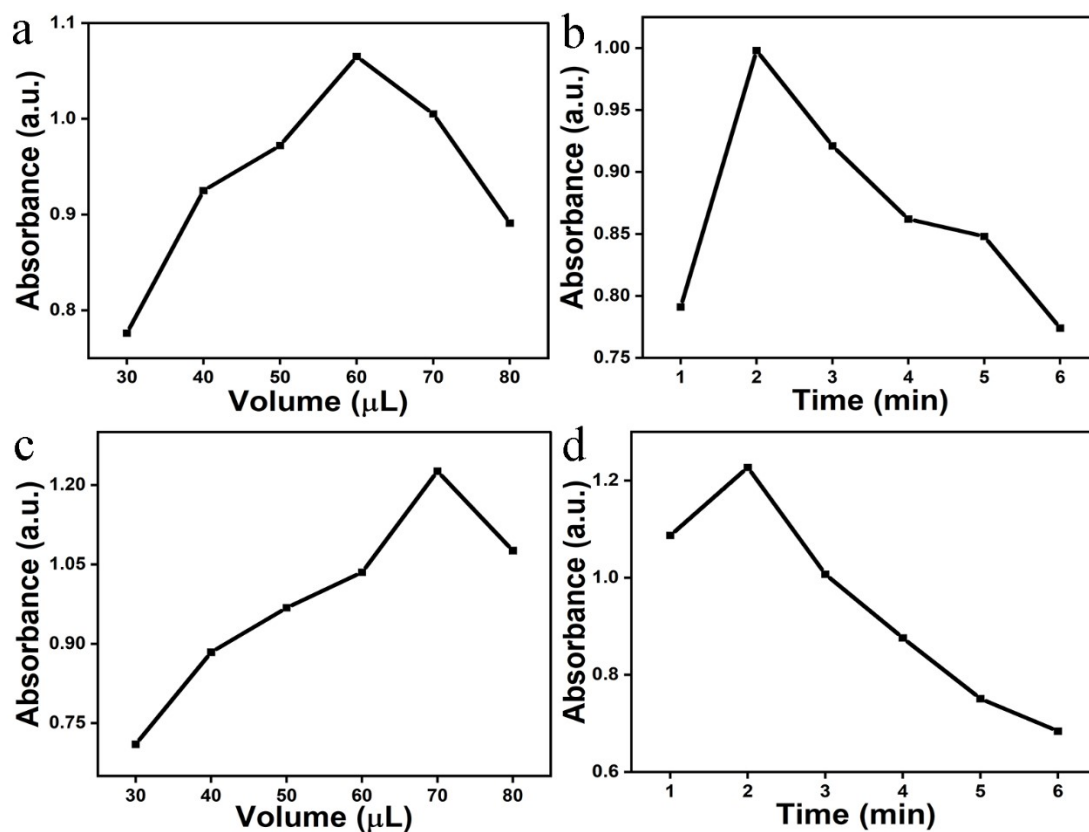

Fig. S5 (a) Effects of catalytic activities of MVCM at different synthetic conditions: the volume of NaOH /H<sub>2</sub>O<sub>2</sub> mixed solution of MVCM- HT. (b) The reaction time of MVCM-HT. (c) The volume of NaOH /H<sub>2</sub>O<sub>2</sub> mixed solution of MVCM- DBD. (d) The reaction time of MVCM-DBD.

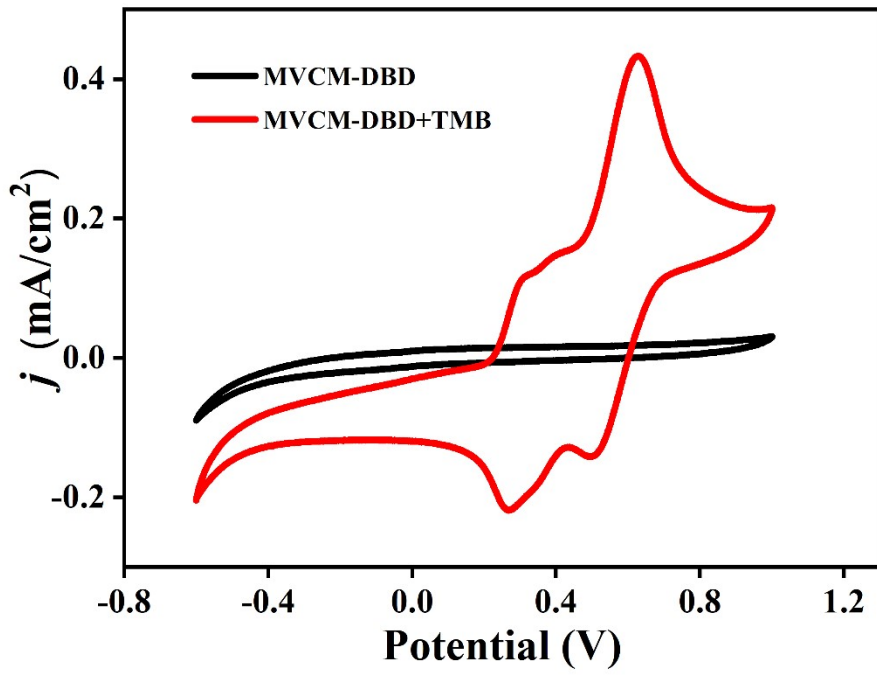

Fig. S6 Cyclic voltammograms of MVCM-DBD modified GCE of TMB solution in HAc-NaAc buffer (0.1 M, pH=4).

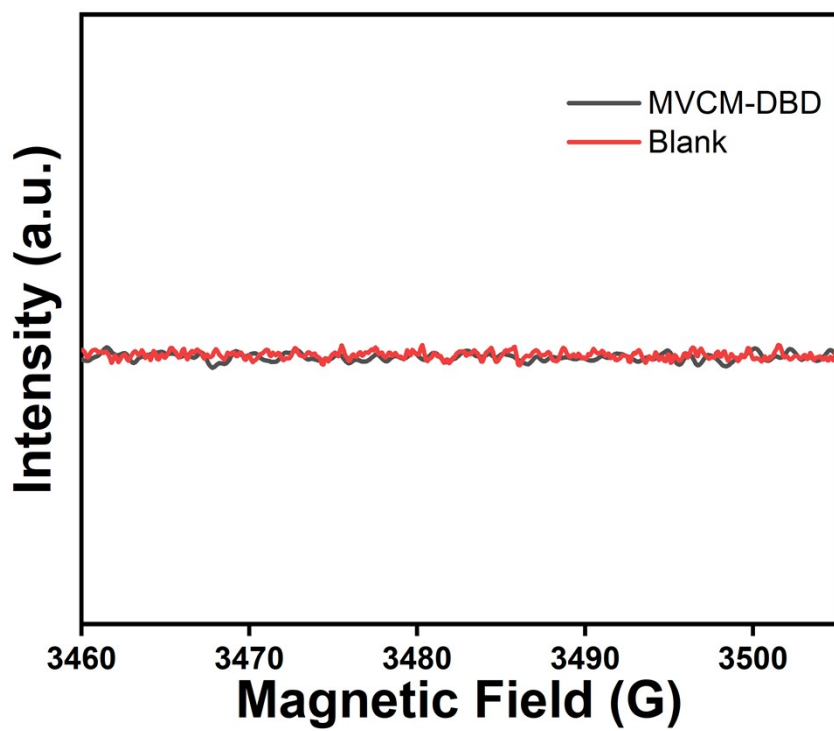

Fig. S7 EPR spectra of MVCM-DBD



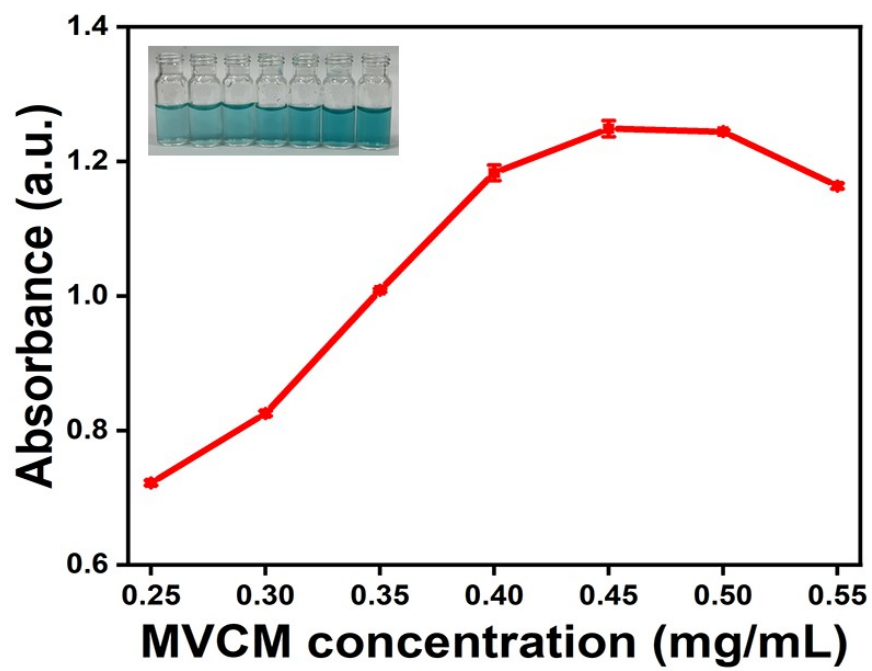

Fig. S8 optimization of the concentration of MVCM-DBD.

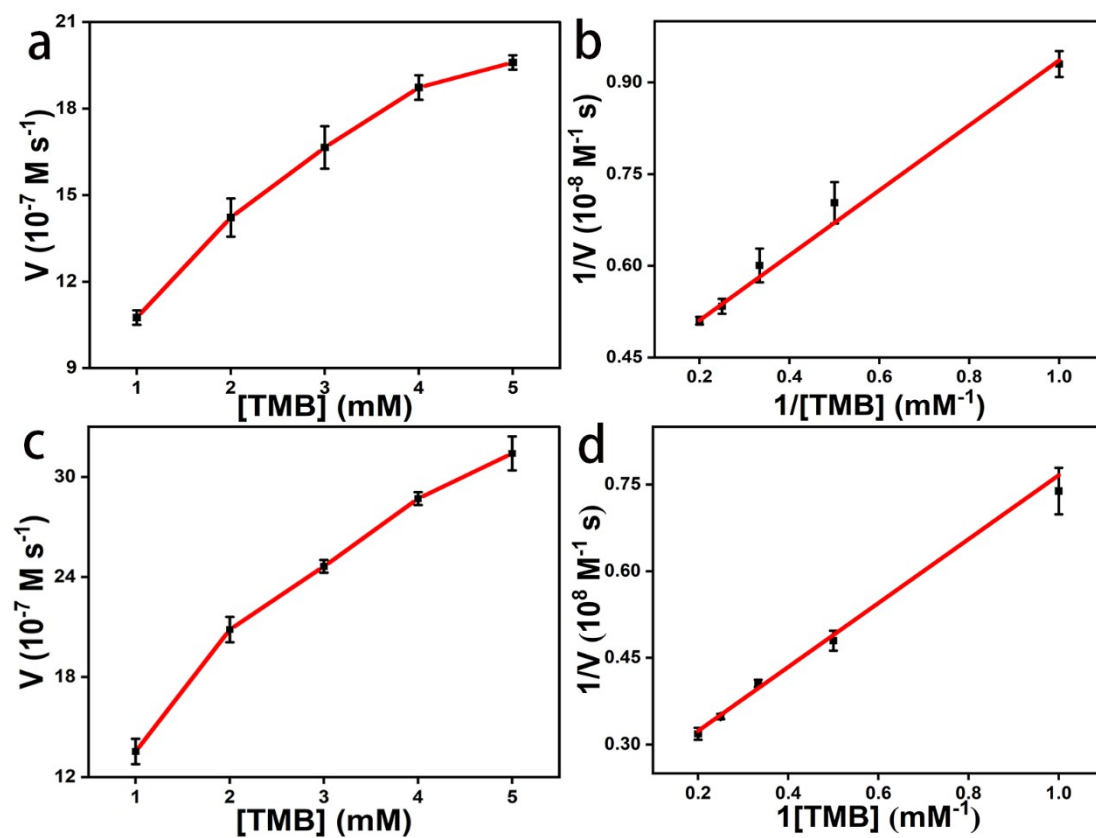

Fig. S9 Steady-state kinetic analysis of (a) MVC-M-HT and (c) MVC-M-DBD, double reciprocal plot of (b) MVC-M-HT and (d) MVC-M-DBD.

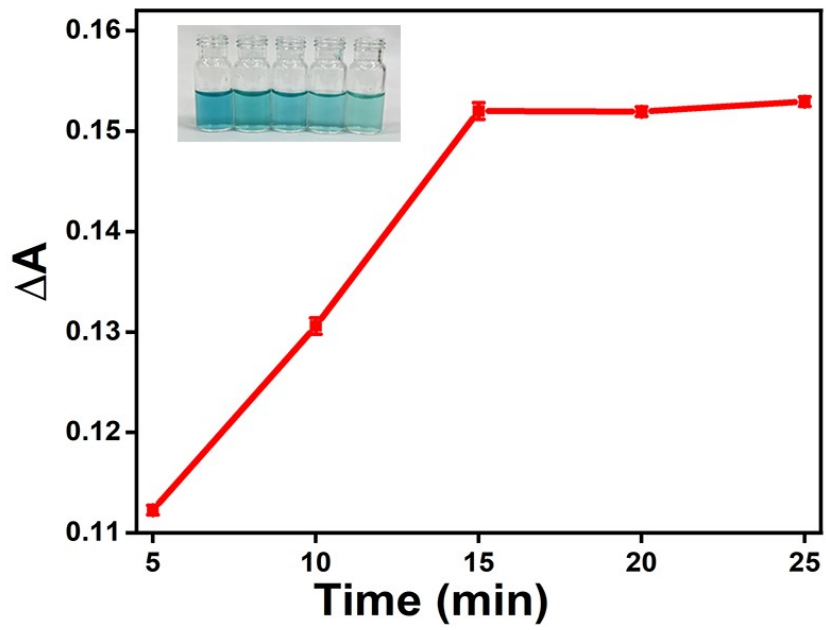

Fig. S10 optimization of DA detection reaction time.

**Table S1** Comparison of detection limits and linear range of different nano materials for DA detection.

| Sample No. | Materials                             | Methods      | Linear range ( $\mu\text{M}$ ) | Limit of detection ( $\mu\text{M}$ ) | Ref.      |
|------------|---------------------------------------|--------------|--------------------------------|--------------------------------------|-----------|
| 1          | Pt/hBNNs                              | Colorimetric | 2-55                           | 0.76                                 | 1         |
| 2          | Fe <sub>3</sub> O <sub>4</sub> NPs    | Colorimetric | 0.01-25                        | 0.35                                 | 2         |
| 3          | CoFe <sub>2</sub> O <sub>4</sub> /CoS | Colorimetric | 0-50                           | 0.58                                 | 3         |
| 4          | GNR/AgNPs                             | Colorimetric | 1-75                           | 0.23                                 | 4         |
| 5          | Pt/NH <sub>2</sub> -MIL-101           | Colorimetric | 1-60                           | 0.42                                 | 5         |
| 6          | Ag NPs                                | Colorimetric | 3.20                           | 1.20                                 | 6         |
| 7          | Au NPs                                | Colorimetric | 2.5-20                         | 2.50                                 | 7         |
| 8          | MVCM-DBD                              | Colorimetric | 5-100                          | 0.74                                 | This work |

## References

1. M. N. Ivanova, E. D. Grayfer, E. E. Plotnikova, L. S. Kibis, G. Darabdhara, P. K. Boruah, M. R. Das and V. E. Fedorov, *Acs Applied Materials & Interfaces*, 2019, 11, 22102-22112.
2. M. Y. Yin, S. Li, Y. Q. Wan, L. P. Feng, X. T. Zhao, S. Zhang, S. H. Liu, P. Cao and H. Wang, *Chemical Communications*, 2019, 55, 12008-12011.
3. Z. Z. Yang, Y. Zhu, M. Q. Chi, C. Wang, Y. Wei and X. F. Lu, *Journal of Colloid and Interface Science*, 2018, 511, 383-391.
4. S. Rostami, A. Mehdinia, R. Niroumand and A. Jabbari, *Analytica Chimica Acta*, 2020, 1120, 11-23.
5. J. Li, K. Y. Xu, Y. Chen, J. Zhao, P. Y. Du, L. B. Zhang, Z. Zhang and X. Q. Lu, *Chemosensors*, 2021, 9.
6. M. R. H. Nezhad, J. Tashkhourian, J. Khodaveisi and M. R. Khoshi, *Analytical Methods*, 2010, 2, 1263-1269.
7. R. Baron, M. Zayats and I. Willner, *Analytical Chemistry*, 2005, 77, 1566-1571.
